# Supplementary material for: Super Typhoon Rai’s Impacts on Siargao Tourism: Deciphering Tourists’ Revisit Intentions through Machine-Learning Algorithms
Source: MDPI journal article supplement (doi:10.3390/su15118463), 2023-05-23
Supplement: s1 [file s1]

# Supplementary Materials

## List of Content

- **Table S1.** Related machine learning algorithm studies.
- **Table S2.** Description of fifty-nine subfeatures.

**Table S1.** Related machine learning algorithm studies.

| Authors                 | Evaluated Tourist Destination/<br>Natural Disaster's Place of Occurrence | Methodology                                                                                                                                                                                  | Purpose of the Study                                                                                                                                                            | Significant Feature Selection Results                                                                                                                                                                                         |
|-------------------------|--------------------------------------------------------------------------|----------------------------------------------------------------------------------------------------------------------------------------------------------------------------------------------|---------------------------------------------------------------------------------------------------------------------------------------------------------------------------------|-------------------------------------------------------------------------------------------------------------------------------------------------------------------------------------------------------------------------------|
| Caraka et al. [21]      | Indonesia                                                                | <ul style="list-style-type: none"> <li>• Feature Selection Using Logistics Variational Approximation</li> <li>• Hierarchical likelihood via structural equation modeling</li> </ul>          | <ul style="list-style-type: none"> <li>• Studied the two social media influencers' impact on visiting Indonesia's tourist destination places</li> </ul>                         | <ul style="list-style-type: none"> <li>• Feature selection helped identify important factors affecting Generation Y's and Generation Z's intention to visit tourist spots</li> </ul>                                          |
| Yuan et al. [22]        | Beijing, China                                                           | <ul style="list-style-type: none"> <li>• Feature selection through text mining's term frequency</li> <li>• Pattern mining</li> <li>• Max-confidence based method</li> </ul>                  | <ul style="list-style-type: none"> <li>• Proposal of a conceptual framework that determines common tourist locations and trip routes</li> </ul>                                 | <ul style="list-style-type: none"> <li>• Feature selection assisted in the pattern identification of tourists' activities</li> </ul>                                                                                          |
| Sheykhmousa et al. [23] | Tacloban, Philippines                                                    | <ul style="list-style-type: none"> <li>• Remote sensing-based methodology</li> <li>• Support vector machine</li> <li>• Feature selection - Hilbert-Schmidt independence criterion</li> </ul> | <ul style="list-style-type: none"> <li>• Assessment of the land cover and land use changes data of a typhoon-affected area to recommend post-disaster recovery plans</li> </ul> | <ul style="list-style-type: none"> <li>• Feature selection results were used as the primary feed of a designed machine-learning algorithm</li> <li>• Feature selection approach increased the algorithm's accuracy</li> </ul> |
| Tien Bui et al. [24]    | Lao Cai, Vietnam                                                         | <ul style="list-style-type: none"> <li>• Deep Learning Neural Network algorithm</li> <li>• Feature selection through</li> </ul>                                                              | <ul style="list-style-type: none"> <li>• Aimed to generate flashflood susceptibility mapping</li> </ul>                                                                         | <ul style="list-style-type: none"> <li>• Subset extracted from feature selection determined the</li> </ul>                                                                                                                    |

|                            |                 | Information Gain Ratio                                                                                                                                                                                                                                                                                                                                   |                                                                                                                                                 | most important flash flood susceptibility factors                                                                                                                                                                              |
|----------------------------|-----------------|----------------------------------------------------------------------------------------------------------------------------------------------------------------------------------------------------------------------------------------------------------------------------------------------------------------------------------------------------------|-------------------------------------------------------------------------------------------------------------------------------------------------|--------------------------------------------------------------------------------------------------------------------------------------------------------------------------------------------------------------------------------|
| Granados-López et al. [30] | General         | <ul style="list-style-type: none"> <li>Four feature selection methods:</li> <li>• Filter selection's Pearson</li> <li>• Permutation Importance</li> <li>• Recursive Feature Elimination</li> <li>• Boruta</li> </ul>                                                                                                                                     | <ul style="list-style-type: none"> <li>• Identification of the best feature selection method in assessing sky conditions</li> </ul>             | <ul style="list-style-type: none"> <li>• Reduced 43 features to multiple combinations from 2 to 34 features</li> <li>• Suggested purposes of each feature selection depending on the important features</li> </ul>             |
| Muñoz et al. [31]          | Southern Norway | <ul style="list-style-type: none"> <li>• Feature selection – filter method's permutation importance</li> <li>• Chi-square</li> <li>• Spearman rank correlation</li> <li>• Density-based clustering</li> <li>• Maximum entropy modeling</li> </ul>                                                                                                        | <ul style="list-style-type: none"> <li>• Investigated online platforms' spatial data to study nature's features</li> </ul>                      | <ul style="list-style-type: none"> <li>• Nine factors contributed to respective models by identifying vital local and international tourism factors</li> </ul>                                                                 |
| Li et al. [32]             | China           | <ul style="list-style-type: none"> <li>• Feature selection – filter method's permutation importance</li> <li>• Random Forest algorithm</li> <li>• Linear Regression</li> <li>• Support Vector Regression</li> <li>• Decision Tree Regression</li> <li>• Random Forest-global variable model</li> <li>• Random Forest important variable model</li> </ul> | <ul style="list-style-type: none"> <li>• Created a model that would predict the distribution of power outages induced by the typhoon</li> </ul> | <ul style="list-style-type: none"> <li>• Recalculated and increased model accuracy by employing permutation importance</li> <li>• Features were ranked accordingly to identify essential power interruption factors</li> </ul> |

|                             |                  |                                                                                                                                                                                                                                                                                                                                                          |                                                                                                                                                                        |                                                                                                                                                                                                                                                                                                                                                                      |
|-----------------------------|------------------|----------------------------------------------------------------------------------------------------------------------------------------------------------------------------------------------------------------------------------------------------------------------------------------------------------------------------------------------------------|------------------------------------------------------------------------------------------------------------------------------------------------------------------------|----------------------------------------------------------------------------------------------------------------------------------------------------------------------------------------------------------------------------------------------------------------------------------------------------------------------------------------------------------------------|
| Kim et al. [33]             | Gangwondo, Korea | <ul style="list-style-type: none"> <li>• Feature selection – filter method's permutation importance</li> <li>• Maximum entropy</li> </ul>                                                                                                                                                                                                                | <ul style="list-style-type: none"> <li>• Investigated the factors affecting landslides in high-risk areas</li> </ul>                                                   | <ul style="list-style-type: none"> <li>• The model was run twice and found 11 important landslide features</li> </ul>                                                                                                                                                                                                                                                |
| Kořakowska & Godlewska [36] | Poland           | <p>Five feature selection methods:</p> <ul style="list-style-type: none"> <li>• RFE with sequential backward elimination</li> <li>• LASSO regression model</li> <li>• Mutual information</li> <li>• Random forest accuracy decrease</li> <li>• Decision tree with sequential forward selection</li> </ul>                                                | <ul style="list-style-type: none"> <li>• Combination of process mining and machine learning to assess tourism operators' prices</li> </ul>                             | <ul style="list-style-type: none"> <li>• Reduced the number of tourism features by generating a new subset derived from important feature selection predictors</li> <li>• Discovered the changes in tourists' perceptions before and after the pandemic</li> <li>• Tourists in Poland valued reimbursements, feedback, assurance, and comparison features</li> </ul> |
| Xiao et al. [37]            | Europe           | <p>Machine learning algorithms</p> <ul style="list-style-type: none"> <li>• Random Forest (RF)</li> <li>• Cubist</li> <li>• Gradient Boosted Machine (GBM)</li> </ul> <p>Feature selection techniques:</p> <ul style="list-style-type: none"> <li>• Recursive Feature Elimination (RFE)</li> <li>• Forward Recursive Feature Selection (FRFS)</li> </ul> | <ul style="list-style-type: none"> <li>• Intended to mitigate climate change that could induce natural disaster aftermaths through unwanted soil properties</li> </ul> | <ul style="list-style-type: none"> <li>• RFE defeated the existing machine learning algorithms by reducing 21 features to the least and most important 12 features</li> </ul>                                                                                                                                                                                        |

|                   |                       |                                                                                                                                                                                                                                                                         |                                                                                                                                                                         |                                                                                                                                                                                                                                                                                                                                          |
|-------------------|-----------------------|-------------------------------------------------------------------------------------------------------------------------------------------------------------------------------------------------------------------------------------------------------------------------|-------------------------------------------------------------------------------------------------------------------------------------------------------------------------|------------------------------------------------------------------------------------------------------------------------------------------------------------------------------------------------------------------------------------------------------------------------------------------------------------------------------------------|
| Peng et al. [8]   | Chongqing City, China | <ul style="list-style-type: none"> <li>• Text pre-processing</li> <li>• RFE</li> <li>• Latent Dirichlet Allocation (LDA)</li> <li>• Locally Linear Embedding (LLE)</li> <li>• Principal Component Analysis (PCA)</li> <li>• Knowledge graph modeling process</li> </ul> | <ul style="list-style-type: none"> <li>• Creation and comparison of hybrid feature selection techniques integrated into multiple machine learning algorithms</li> </ul> | <ul style="list-style-type: none"> <li>• Assessed 18 tourism features and nominal tourist data using feature selection and machine learning techniques</li> <li>• Supported the versatility of wrapper and embedded techniques because they were applied in supervised and unsupervised learning</li> </ul>                              |
| Li et al. [42]    | Songhua River, China  | <ul style="list-style-type: none"> <li>• Embedded feature selection</li> <li>• Logistic regression</li> <li>• Random forest</li> </ul>                                                                                                                                  | <ul style="list-style-type: none"> <li>• Integration of feature selection and machine learning techniques to explore factors triggering immense flash flood</li> </ul>  | <ul style="list-style-type: none"> <li>• Reduced 52 flashflood susceptibility factors to 28 significant features</li> <li>• Comparison of the model's accuracy model and embedded method's significant features</li> <li>• Feature selection results were fed into logistic regression to lessen flash flood impacts in China</li> </ul> |
| Chang et al. [39] | General               | <ul style="list-style-type: none"> <li>• LASSO</li> <li>• Decision tree</li> <li>• Support Vector Machine-Recursive Feature Elimination (SVM-RFE)</li> </ul>                                                                                                            | <ul style="list-style-type: none"> <li>• Investigation of hotel features that affect tourists' travel and revisit intentions</li> </ul>                                 | <ul style="list-style-type: none"> <li>• LASSO could reduce 13 features into 8 and 10, and 10 hotel features had the highest</li> </ul>                                                                                                                                                                                                  |

|                      |                    |                                                                                                                                                   |                                                                                                                                                                                                                                                                                                                                                                                                                            |
|----------------------|--------------------|---------------------------------------------------------------------------------------------------------------------------------------------------|----------------------------------------------------------------------------------------------------------------------------------------------------------------------------------------------------------------------------------------------------------------------------------------------------------------------------------------------------------------------------------------------------------------------------|
|                      |                    | <ul style="list-style-type: none"> <li>• Back-propagation Neural Networks</li> <li>• Support Vector Machines</li> </ul>                           | accuracy rate when fed into other machine learning algorithms                                                                                                                                                                                                                                                                                                                                                              |
| Jones et al. [40]    | Philippines        | <ul style="list-style-type: none"> <li>• Binary Logistic Regression</li> <li>• LASSO</li> <li>• Area Under the Receiver Operator Curve</li> </ul> | <ul style="list-style-type: none"> <li>• Assessment of different typhoons to select preventive and triggering landslide factors with the highest accuracy rate</li> <li>• Accentuated the common landslide-related factors that were all present in 4 time points</li> <li>• The highest accuracy produced was 82% for typhoons evaluated from 2009 to 2018</li> </ul>                                                     |
| Guzzetti et al. [43] | Multiple countries | <ul style="list-style-type: none"> <li>• Historical data analysis</li> <li>• Logistic regression ANN</li> </ul>                                   | <ul style="list-style-type: none"> <li>• Utilized environmental features such as morphology, drainage, geology, and soil for areas affected by landslides</li> <li>• Designed a warning system for residents, tourists, and foreigners</li> <li>• Modeled low, moderate, and high landslide susceptibility</li> </ul>                                                                                                      |
| Tsaur et al. [13]    | Taiwan             | <ul style="list-style-type: none"> <li>• Logistic regression ANN</li> </ul>                                                                       | <ul style="list-style-type: none"> <li>• Identification of the best machine learning algorithm that would yield important factors affecting tourist loyalty</li> <li>• Employed machine learning to determine if tourists would recommend, revisit, and provide referrals to hotels.</li> <li>• Logistic regression identified the top three loyalty factors: (1) tangible, (2) responsiveness, and (3) empathy</li> </ul> |

|                      |                                  |                                                                                                                                                                 |                                                                                                                                                                      |                                                                                                                                                                                                                                                                             |  |                                                                                                                                                                                                                 |
|----------------------|----------------------------------|-----------------------------------------------------------------------------------------------------------------------------------------------------------------|----------------------------------------------------------------------------------------------------------------------------------------------------------------------|-----------------------------------------------------------------------------------------------------------------------------------------------------------------------------------------------------------------------------------------------------------------------------|--|-----------------------------------------------------------------------------------------------------------------------------------------------------------------------------------------------------------------|
|                      |                                  |                                                                                                                                                                 |                                                                                                                                                                      |                                                                                                                                                                                                                                                                             |  | <ul style="list-style-type: none"><li>• ANN's top three tourist loyalty aspects: (1) responsiveness, (2) tangible, and (3) location</li><li>• ANN had a better model fitting than logistic regression</li></ul> |
| Tien Bui et al. [11] | Cat Ba National Park, Vietnam    | <ul style="list-style-type: none"><li>• Kernel logistic regression</li><li>• Receiver operating characteristic curve</li><li>• Support vector machine</li></ul> | <ul style="list-style-type: none"><li>• Proposed to create forest fire susceptibility map to manage forest fire management effectively and efficiently</li></ul>     | <ul style="list-style-type: none"><li>• Established a new logistic regression approach to control the quality of the forest fire susceptibility model</li><li>• The customized LR model had a 92.2% prediction rate and overpowered other conventional algorithms</li></ul> |  |                                                                                                                                                                                                                 |
| Chen et al., [12]    | Alishan Forestry Railway, Taiwan | <ul style="list-style-type: none"><li>• Logistic regression</li><li>• Receiver operating characteristic curve</li></ul>                                         | <ul style="list-style-type: none"><li>• Evaluation of landslide's environmental and hazard issues by combining geographical system and logistic regression</li></ul> | <ul style="list-style-type: none"><li>• Customized logistic regression by maximizing Taiwan's geographical information system</li><li>• Predicted landslides and plotted occurrence frequencies and risk levels</li></ul>                                                   |  |                                                                                                                                                                                                                 |

|                            |                          |                                                                                                                                                                          |                                                                                                                                                                                           |                                                                                                                                                                                                                                        |
|----------------------------|--------------------------|--------------------------------------------------------------------------------------------------------------------------------------------------------------------------|-------------------------------------------------------------------------------------------------------------------------------------------------------------------------------------------|----------------------------------------------------------------------------------------------------------------------------------------------------------------------------------------------------------------------------------------|
| Talwar et al. [17]         | Japan                    | <ul style="list-style-type: none"> <li>• ANN</li> </ul>                                                                                                                  | <ul style="list-style-type: none"> <li>• Application of the five personality traits theoretical model to understand travel intention throughout the COVID-19 pandemic era</li> </ul>      | <ul style="list-style-type: none"> <li>• Extraversion feature greatly influenced leisure travel during a crisis</li> <li>• Openness to experience immensely affected leisure intention after a crisis</li> </ul>                       |
| Leong et al. [51]          | Malaysia                 | <ul style="list-style-type: none"> <li>• Structural Equation Modeling (SEM) and ANN</li> </ul>                                                                           | <ul style="list-style-type: none"> <li>• Employed a service quality model to determine tourist satisfaction and loyalty in an airline company</li> </ul>                                  | <ul style="list-style-type: none"> <li>• Responsiveness, tangibles, and reliability were the most important features of tourist satisfaction</li> <li>• Tourist satisfaction had the strongest influence on tourist loyalty</li> </ul> |
| Mikhailov & Kashevnik [46] | Saint Petersburg, Russia | <ul style="list-style-type: none"> <li>• ANN</li> </ul>                                                                                                                  | <ul style="list-style-type: none"> <li>• Evaluated driving-related features (e.g., distance, duration, speed, acceleration) to simplify the interpretation of tourist behavior</li> </ul> | <ul style="list-style-type: none"> <li>• Determined the tourist approach to organizing trips</li> <li>• Proposed a smart digital pattern beneficial to tourism stakeholders</li> </ul>                                                 |
| Claveria & Torra [14]      | Catalonia, Spain         | <ul style="list-style-type: none"> <li>• Historical data analysis, autoregressive integrated moving average, self-exciting threshold autoregressions, and ANN</li> </ul> | <ul style="list-style-type: none"> <li>• Aimed to increase the forecasting accuracy model by maximizing tourist behavioral data</li> </ul>                                                | <ul style="list-style-type: none"> <li>• Forecasting model of tourist arrival was more effective than an overnight stay</li> </ul>                                                                                                     |
| Law & Au [45]              | Hong Kong                | <ul style="list-style-type: none"> <li>• Historical data analysis, multiple regression, naive, moving average, exponent</li> </ul>                                       | <ul style="list-style-type: none"> <li>• Prediction of Japanese tourist demands in traveling to Hong Kong</li> </ul>                                                                      | <ul style="list-style-type: none"> <li>• ANN outperformed traditional statistical techniques</li> </ul>                                                                                                                                |



|                      |                            |   |                                     |   |                                                                                        |                                                                                                                                 |
|----------------------|----------------------------|---|-------------------------------------|---|----------------------------------------------------------------------------------------|---------------------------------------------------------------------------------------------------------------------------------|
|                      |                            |   | smoothing, and<br>ANN               |   |                                                                                        | through the<br>integrated six<br>nodes of ANN<br>input layer                                                                    |
| Palmer et al.<br>[7] | Balearic<br>Islands, Spain | • | Historical data<br>analysis and ANN | • | Forecast the<br>tourist's<br>expenditure by<br>covering 60<br>different time<br>points | • Proposed a time<br>series tourism<br>forecasting<br>model to<br>leverage one of<br>Spain's popular<br>tourist<br>destinations |

**Table S2.** Description of fifty-nine subfeatures.

| <b>Subfeature</b> | <b>Interpretation</b>                                                                                                                                                |
|-------------------|----------------------------------------------------------------------------------------------------------------------------------------------------------------------|
| ATI1              | I am aware of the effects of typhoon Rai (Odette) on human lives.                                                                                                    |
| ATI2              | I am aware of the effects of typhoon Rai (Odette) on infrastructures.                                                                                                |
| ATI3              | I am aware that the effects of typhoon Rai (Odette) are severe.                                                                                                      |
| ATI4              | I am aware that the effects of typhoon Rai (Odette) may last for a long time.                                                                                        |
| ATI5              | I am aware that people might find it difficult to restore the old Siargao.                                                                                           |
| ATI6              | I know where to access reliable information about the impacts of typhoon Rai (Odette).                                                                               |
| ATI7              | I can easily access platforms that provide reliable information about the impacts of typhoon Rai (Odette).                                                           |
| ATI8              | I closely follow the impacts of typhoon Rai (Odette) through reliable platforms.                                                                                     |
| ATI9              | The amount of available information about the impacts of typhoon Rai (Odette) is sufficient.                                                                         |
| CM1               | The government spearheaded typhoon response and recovery in Siargao.                                                                                                 |
| CM2               | Other organizations (private companies, nonprofit organizations, etc.) helped the government assist with the essential needs of the affected individuals in Siargao. |
| CM3               | The government and other organizations genuinely listened to the concerns of the affected individuals in Siargao.                                                    |
| CM4               | The government and other organizations provided relief programs to the affected individuals in Siargao.                                                              |
| CM5               | The government and other organizations provided timely and rapid crisis responses to the affected individuals in Siargao.                                            |
| CM6               | The government and other organizations have ongoing infrastructure rehabilitation projects in Siargao.                                                               |
| CM7               | The government and other organizations can finish post-typhoon recovery projects in Siargao.                                                                         |
| HM1               | Traveling to Siargao is fun.                                                                                                                                         |
| HM2               | Traveling to Siargao is exciting.                                                                                                                                    |
| HM3               | Traveling to Siargao is a new experience.                                                                                                                            |
| HM4               | Traveling to Siargao is a once-in-a-lifetime experience.                                                                                                             |
| HM5               | Traveling to Siargao gives me pleasure.                                                                                                                              |
| HM6               | Traveling to Siargao lets me experience a different lifestyle.                                                                                                       |
| HM7               | Traveling to Siargao makes me feel refreshed physically and mentally.                                                                                                |
| PTC1              | I find it difficult to find a credible travel agency when planning a trip to Siargao.                                                                                |
| PTC2              | I find it uncomfortable to visit Siargao after typhoon Rai (Odette).                                                                                                 |
| PTC3              | I think there is limited access to public transportation in Siargao.                                                                                                 |
| PTC4              | I think my safety is not guaranteed in Siargao.                                                                                                                      |
| PTC5              | I think my financial resources are not enough to revisit Siargao.                                                                                                    |
| PTC6              | I think I don't have enough time to revisit Siargao.                                                                                                                 |
| PTC7              | I think I don't have updated information about the tourist spots in Siargao.                                                                                         |
| PTC8              | I think tourism infrastructures haven't recovered from typhoon Rai (Odette) yet.                                                                                     |

|      |                                                                                                                   |
|------|-------------------------------------------------------------------------------------------------------------------|
| PTC9 | I think no one is available to travel with me.                                                                    |
| PTR1 | I worry about recurring natural disasters in Siargao after typhoon Rai (Odette).                                  |
| PTR2 | I worry about safety problems in Siargao after typhoon Rai (Odette).                                              |
| PTR3 | I worry about poor quality of life in Siargao after typhoon Rai (Odette).                                         |
| PTR4 | I worry about unappealing tourist spots in Siargao after typhoon Rai (Odette).                                    |
| PTR5 | I worry about unsatisfactory environmental quality in Siargao after typhoon Rai (Odette).                         |
| PTR6 | I worry that a trip to Siargao after typhoon Rai (Odette) will negatively affect my mental health.                |
| PTR7 | I worry that a trip to Siargao after typhoon Rai (Odette) will change how my friends think of me.                 |
| PTR8 | I worry that a trip to Siargao after typhoon Rai (Odette) will be a huge financial burden than other local trips. |
| PTR9 | I worry that a trip to Siargao after typhoon Rai (Odette) will not be worth the price.                            |
| ATT1 | I think revisiting Siargao is a good idea despite the impacts of typhoon Rai (Odette).                            |
| ATT2 | I think revisiting Siargao is beneficial despite the impacts of typhoon Rai (Odette).                             |
| ATT3 | I think revisiting Siargao is convenient despite the impacts of typhoon Rai (Odette).                             |
| ATT4 | I think revisiting Siargao can improve my social media engagement.                                                |
| ATT5 | I think revisiting Siargao leads to significant opportunities.                                                    |
| ATT6 | I am extremely interested in revisiting Siargao despite the impacts of typhoon Rai (Odette).                      |
| SN1  | People who are important to me think I should revisit Siargao.                                                    |
| SN2  | People who influence my behavior think I should revisit Siargao.                                                  |
| SN3  | People whose opinions I value prefer that I revisit Siargao.                                                      |
| SN4  | I think I am under peer pressure to revisit Siargao.                                                              |
| SN5  | I think society urges everyone to revisit Siargao.                                                                |
| SN6  | I think I need to revisit Siargao if people around me do the same.                                                |
| PBC1 | I believe that my decision to revisit Siargao is completely up to me.                                             |
| PBC2 | I believe that it is acceptable to revisit Siargao despite the impacts of typhoon Rai (Odette).                   |
| PBC3 | I can easily plan a trip to Siargao despite the impacts of typhoon Rai (Odette).                                  |
| PBC4 | I have financial resources to revisit Siargao.                                                                    |
| PBC5 | I have time to revisit Siargao.                                                                                   |
| PBC6 | I am confident that I can revisit Siargao.                                                                        |

---
